# Supplementary material for: Assessment of the Diagnostic Accuracy of Biparametric Magnetic Resonance Imaging for Prostate Cancer in Biopsy-Naive Men: The Biparametric MRI for Detection of Prostate Cancer (BIDOC) Study
Source: PubMed Central journal article supplement (PMC6324414; doi:10.1001/jamanetworkopen.2018.0219), 2018-06-08
Supplement: jamanetwopen-1-e180219-s001.pdf [file jamanetwopen-1-e180219-s001.pdf]

## Supplementary Online Content

Boesen L, Nørgaard N, Løgager V, et al. Assessment of the diagnostic accuracy of biparametric magnetic resonance imaging for prostate cancer in biopsy-naive men: the Biparametric MRI for Detection of Prostate Cancer (BIDOC) study. *JAMA Netw Open*. 2018;1(1):e180219. doi:10.1001/jamanetworkopen.2018.0219

**eTable 1.** Biparametric MRI Sequence Parameters

**eTable 2.** Patient Characteristics of Men (n = 8) With Low-Suspicion bpMRIs (PI<sub>mod</sub> 1-2)

**eFigure 1.** Comparison of bpMRI Suspicion Scores to Cancer Significance

**eFigure 2.** Decision Curve Analysis

This supplementary material has been provided by the authors to give readers additional information about their work.

**eTable 1.** Biparametric MRI Sequence Parameters

| Sequence                                  | TR (ms) | TE (ms) | NEX/Averages | FOV (mm)                   | Resolution/<br>Voxel size (mm)                                                             | Slices (n) | Slice thickness (mm) | Gap (mm) | Time (min:sec) |
|-------------------------------------------|---------|---------|--------------|----------------------------|--------------------------------------------------------------------------------------------|------------|----------------------|----------|----------------|
| Sagittal luxury scout                     | 3.3     | 1.65    | 2            | AP 270<br>LR 55<br>FH 270  | <u>ACQ:</u><br>$1.5 \times 1.5 \times 3$<br><u>Recon:</u><br>$0.84 \times 0.84 \times 3$   | 14         | 3                    | 1        | 00:29          |
| T2W TSE Axial                             | 3,745   | 90      | 1            | AP 180<br>LR 180<br>FH 104 | <u>ACQ:</u><br>$0.45 \times 0.45 \times 3$<br><u>Recon:</u><br>$0.22 \times 0.22 \times 3$ | 30         | 3                    | 0.5      | 8:52           |
| Diffusion EPI b-value: 0, 100, 800, 2,000 | 9,983   | 71      | 2            | AP 180<br>LR 180<br>FH 104 | <u>ACQ:</u><br>$2.1 \times 2.2 \times 4$<br><u>Recon:</u><br>$0.8 \times 0.8 \times 4$     | 26         | 4                    | 0        | 6:30           |

T2W = T2-weighted imaging; TSE = turbo spin echo; EPI = echo planar imaging; TR = repetition time; TE = echo time; FA = flip angle; ACQ = acquisition matrix; Recon = reconstruction; NEX = number of excitations/average signals; FOV = field of view; AP = anterior-posterior; LR = left-right; FH = foot-head

**eTable 2.** Patient Characteristics of Men (n = 8) With Low-Suspicion bpMRIs (PI<sub>mod</sub> 1-2)

| Patient ID   | Time MRI to bx (days) | Age (years) | PSA (ng/ml)   | cT <sub>DRE</sub> stage | Prostate volume (ml) | PSA density (ng/ml/cc) | Standard PCa positive cores (num/10) | Gleason score / Grade group | MCCL       | BpMRI PI <sub>mod</sub> score |
|--------------|-----------------------|-------------|---------------|-------------------------|----------------------|------------------------|--------------------------------------|-----------------------------|------------|-------------------------------|
| 420          | 7                     | 67          | 4.4           | T1c                     | 37                   | 0.12                   | 2                                    | 4+3 / 3                     | 25         | 2                             |
| 536          | 9                     | 70          | 7.2           | T2c                     | 54                   | 0.13                   | 10                                   | 4+5 / 5                     | 100        | 1                             |
| 582          | 2                     | 54          | 4.7           | T1c                     | 34                   | 0.14                   | 1                                    | 4+4 / 4                     | 10         | 1                             |
| 649          | 6                     | 62          | 5.9           | T1c                     | 58                   | 0.10                   | 2                                    | 4+3 / 3                     | 35         | 2                             |
| 701          | 2                     | 57          | 14            | T1c                     | 81                   | 0.17                   | 4                                    | 3+4 / 2                     | 70         | 1                             |
| 839          | 6                     | 70          | 8.7           | T1c                     | 48                   | 0.18                   | 2                                    | 4+3 / 3                     | 50         | 1                             |
| 911          | 6                     | 72          | 4.7           | T2b                     | 18                   | 0.26                   | 5                                    | 4+3 / 3                     | 85         | 1                             |
| 1013         | 2                     | 66          | 5.4           | Tx                      | 88                   | 0.06                   | 1                                    | 4+4 / 4                     | 15         | 1                             |
| Median [IQR] | 6 [6–6]               | 67 [67–70]  | 5.7 [5.7–7.6] |                         | 51 [51–64]           | 0.14 [0.14–0.17]       |                                      |                             | 43 [43–74] |                               |

PCa = prostate cancer; cT<sub>DRE</sub> = tumor stage by digital rectal examination; MCCL = maximum cancer-core length; IQR = Inter quartile range; PI<sub>mod</sub> = modified prostate imaging reporting and data system score

**eFigure 1.** Comparison of bpMRI Suspicion Scores to Cancer Significance

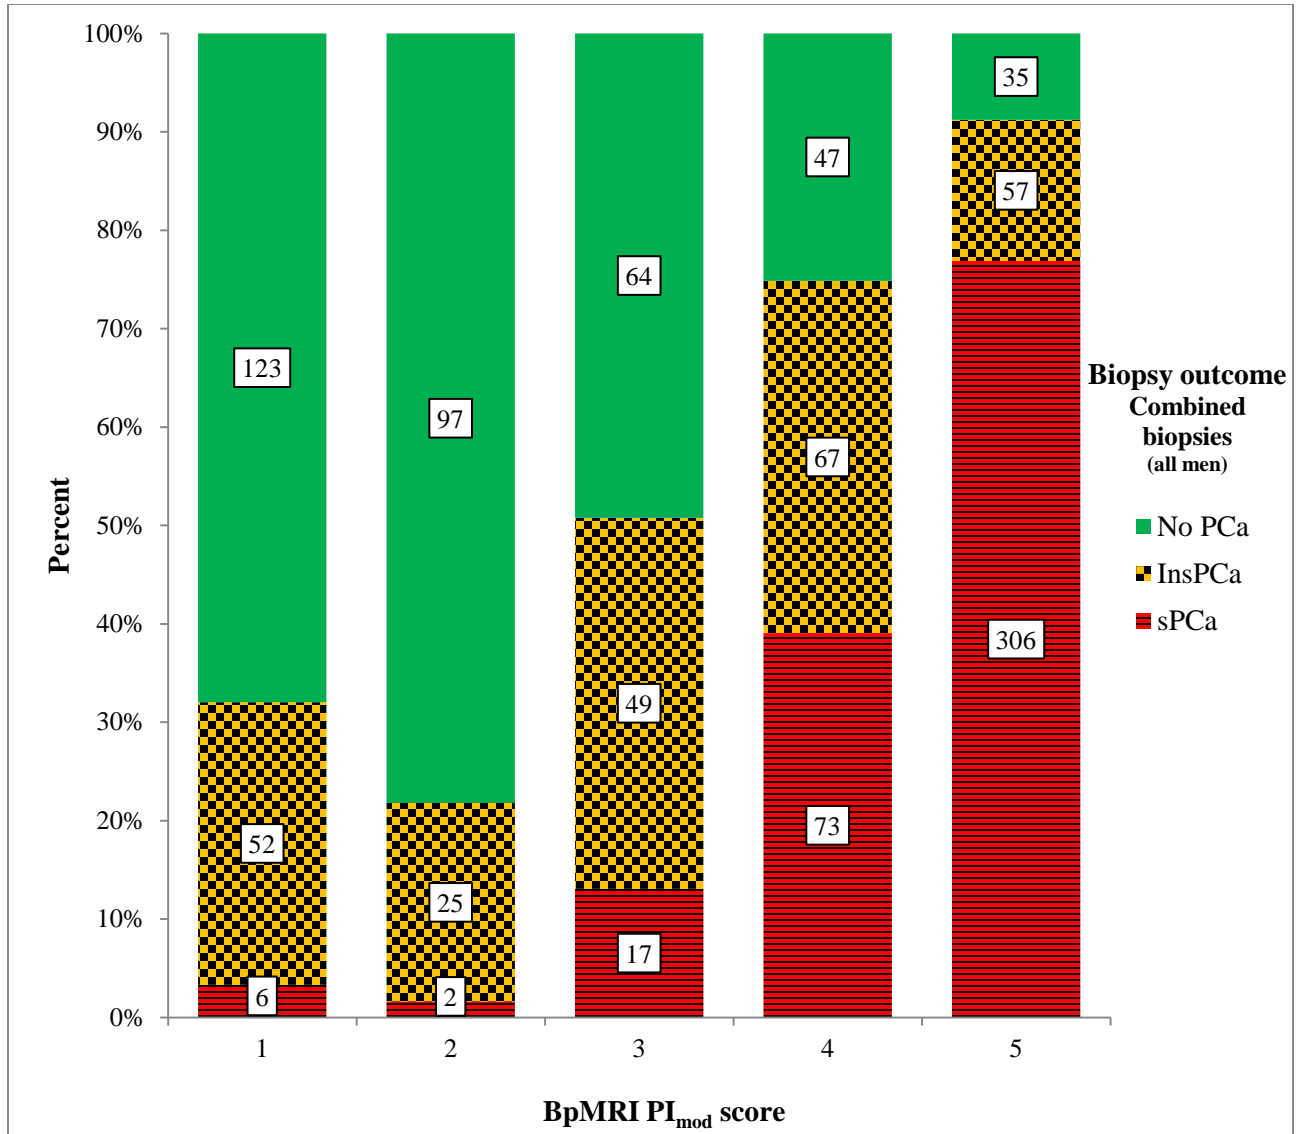

PCa = prostate cancer; InsPCa = insignificant PCa; sPCa = significant PCa; bpMRI = biparametric MRI; PI<sub>mod</sub> = modified prostate imaging reporting and data system

Prostate cancer detection rates for all patients (N = 1020) based on combined (standard plus targeted) biopsy results and stratified by cancer significance (primary definition) within each bpMRI PI<sub>mod</sub> score. All men underwent standard biopsies, but only those with bpMRI PI<sub>mod</sub> 3–5 also underwent targeted biopsies.

**eFigure 2.** Decision Curve Analysis

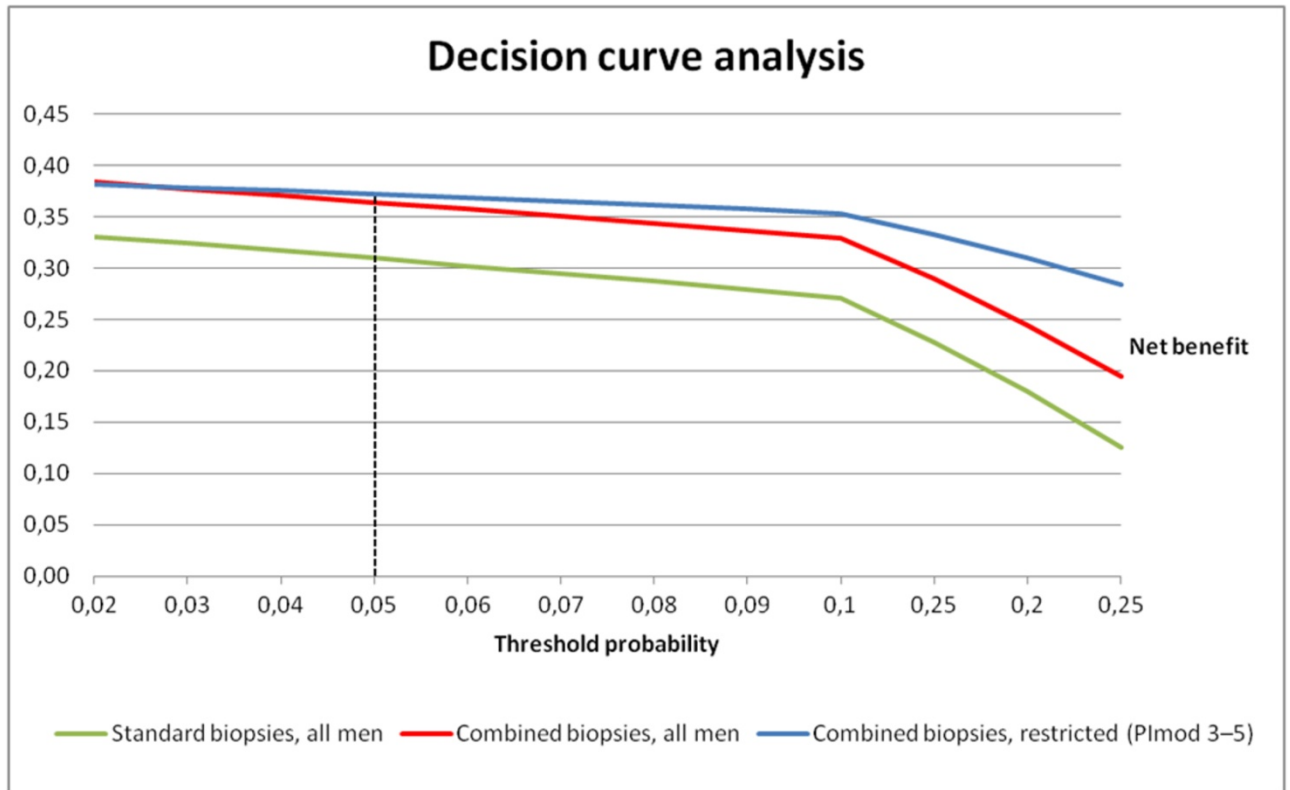

Decision curve showing net benefit for carrying out biopsies in men at risk of significant prostate cancer. The net benefit for carrying out standard biopsies in all men (standard approach) is lower for all threshold probabilities compared to using bpMRI as a triage test and perform combined biopsies restricted to men with suspicious bpMRI (PI<sub>mod</sub> 3-5). The dotted vertical line indicates a threshold of 5 % equivalent to perform biopsies in 20 men to find one additional sPCa.
